# Supplementary material for: Dimpled SiO2@γ-Fe2O3 nanocomposites – fabrication and use for arsenic adsorption in aqueous medium
Source: Royal Society of Chemistry journal article supplement (doi:10.1039/d0ra09907d), 2021-01-01
Supplement: d0ra09907d1.pdf [file d0ra09907d1.pdf]

## Electronic Supplementary Information

for

### **Dimpled SiO<sub>2</sub>@ $\gamma$ -Fe<sub>2</sub>O<sub>3</sub> nanocomposites – fabrication and use for arsenic adsorption in aqueous medium**

Saruta Deeprasert,<sup>a,b</sup> Lilin Wang,<sup>a,b</sup> Konstantinos Simeonidis,<sup>c</sup> Nguyen Thi Kim  
Thanh,<sup>a,b,\*</sup> Etienne Duguet,<sup>d,\*</sup> Stefanos Mourdikoudis,<sup>a,b,\*</sup>

<sup>a</sup> Biophysics Group, Department of Physics and Astronomy, University College London,  
London, WC1E 6BT, UK

<sup>b</sup> UCL Healthcare Biomagnetic and Nanomaterials Laboratories, 21 Albemarle Street,  
London W1S 4BS, UK

<sup>c</sup> Department of Physics, Aristotle University of Thessaloniki, 54124 Thessaloniki, Greece

<sup>d</sup> Univ. Bordeaux, CNRS, Bordeaux INP, ICMCB, UMR 5026, F-33600 Pessac, France

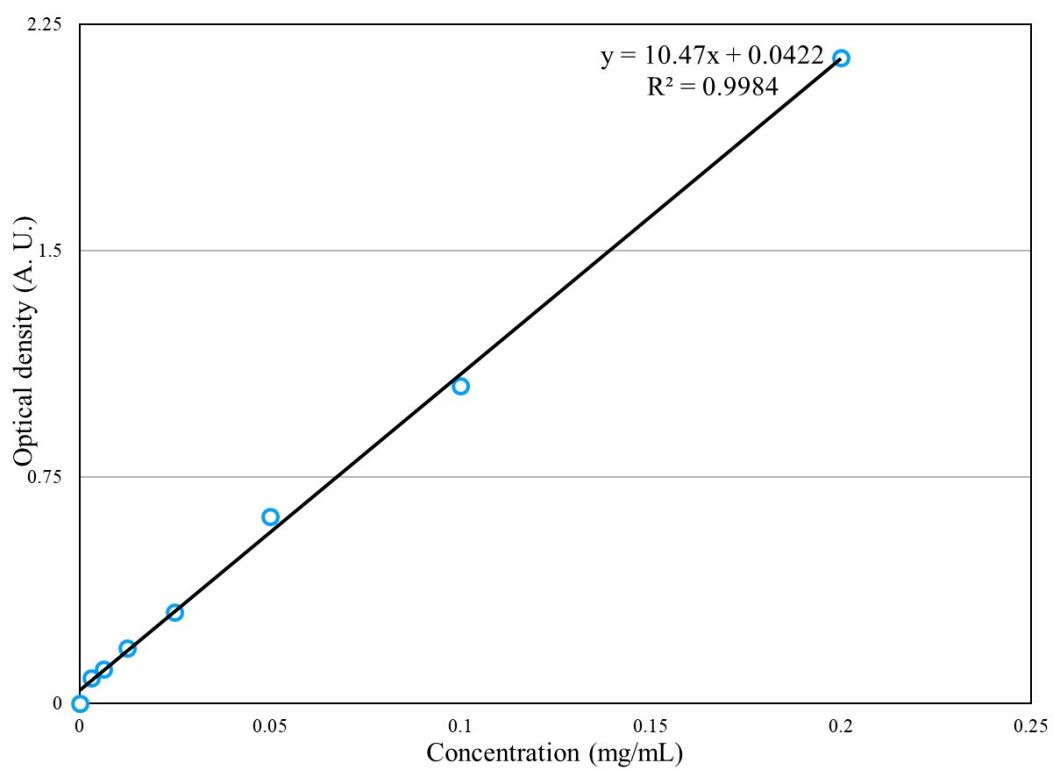

**Fig. S1** Calibration curve created by UV-Vis measurements of Fe-containing samples with known concentration.

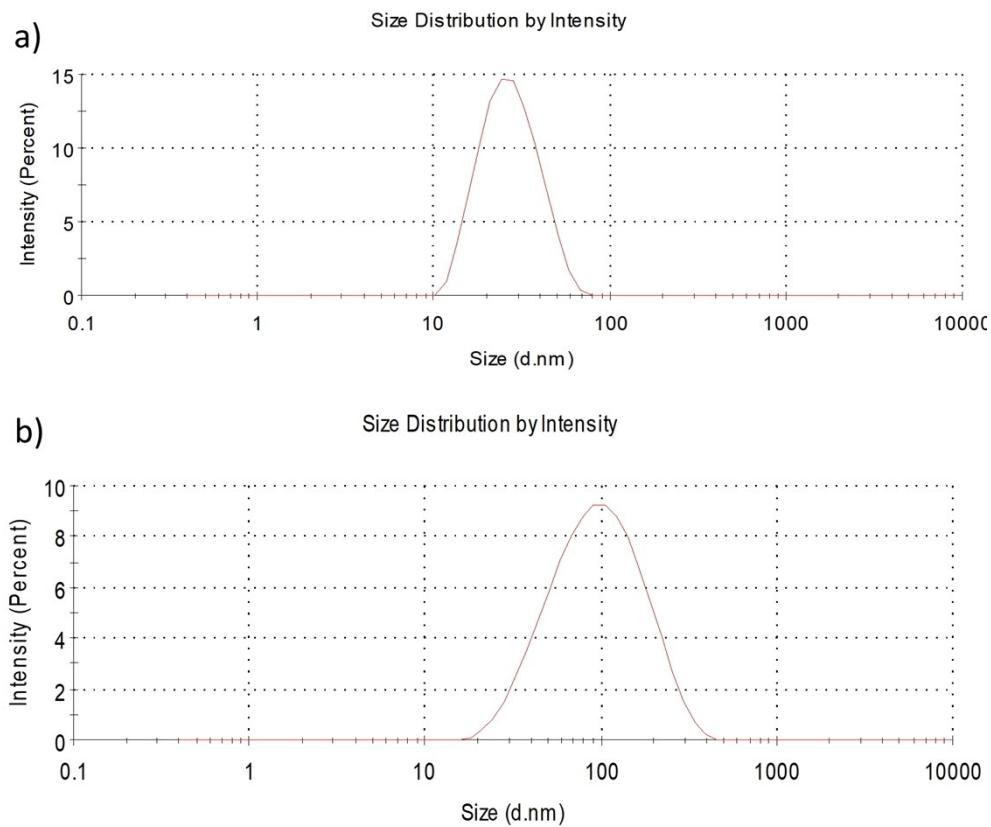

**Fig. S2** DLS measurements for citrate-capped (a) and uncapped  $\gamma$ -Fe<sub>2</sub>O<sub>3</sub> NFs (b).

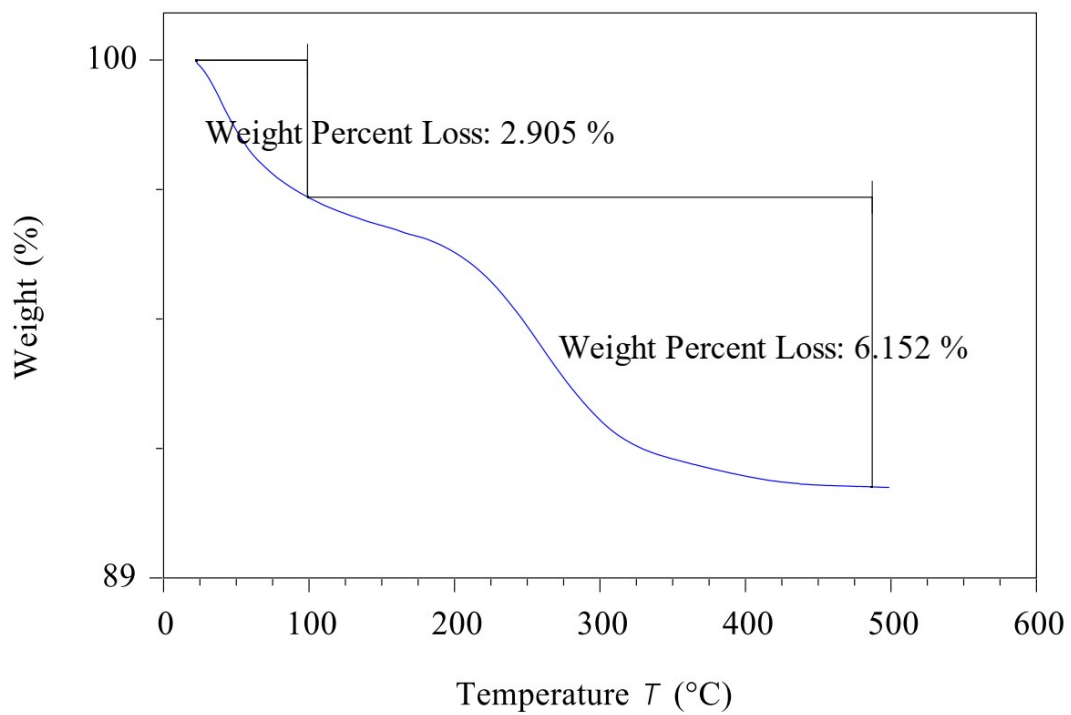

**Fig. S3** Thermogravimetric analysis of maghemite NFs.

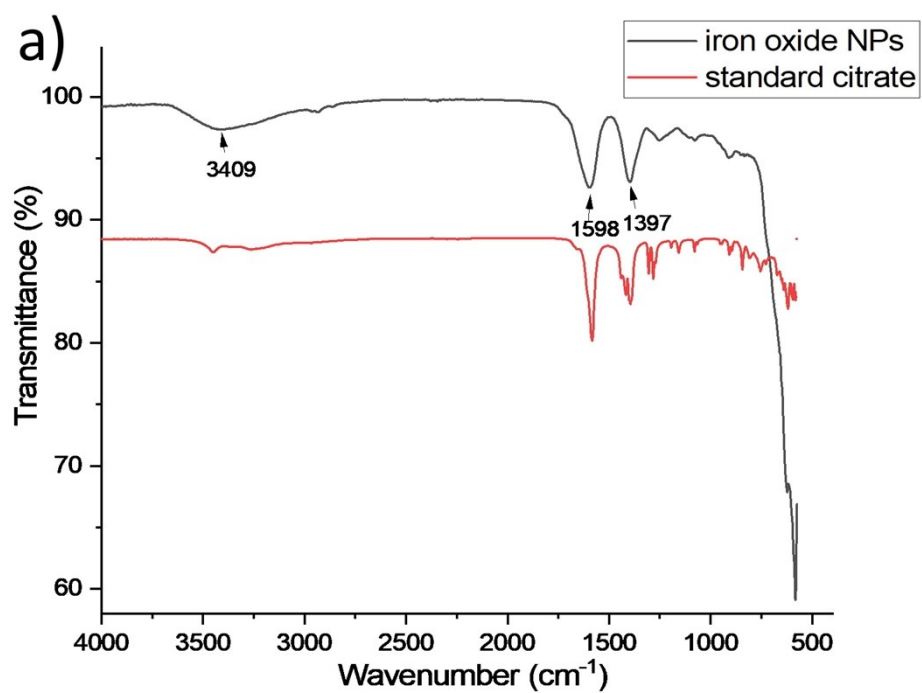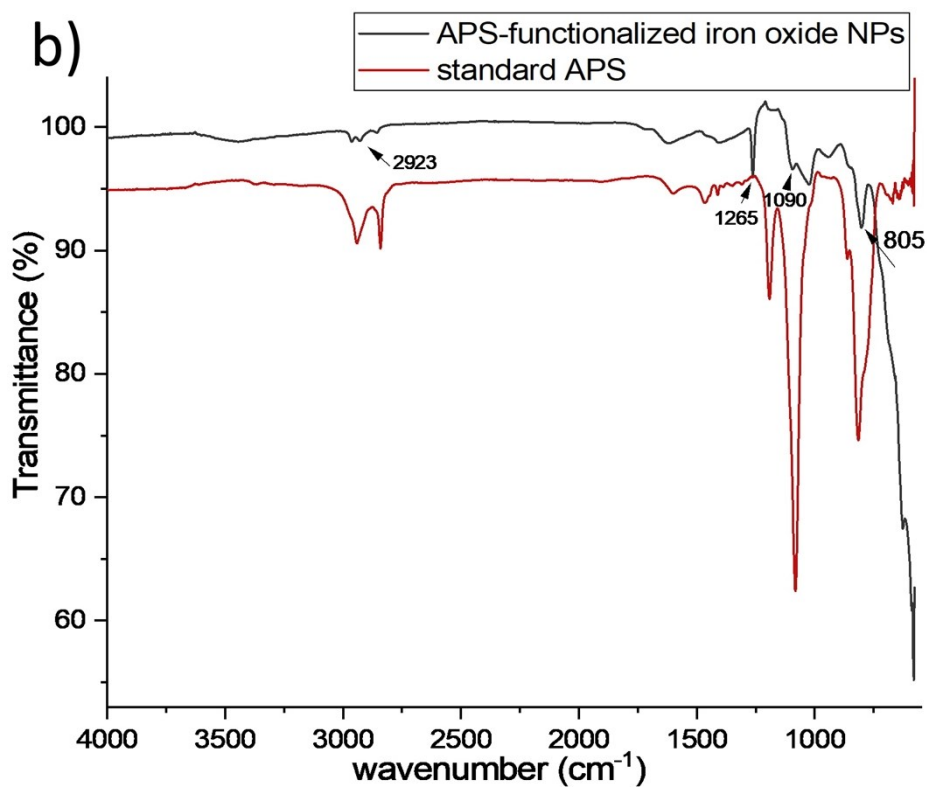

**Fig. S4** FTIR spectra of: a standard citrate sample and of the pre-synthesized iron oxide NPs (a), APS molecule and APS-modified iron oxide NPs (b).

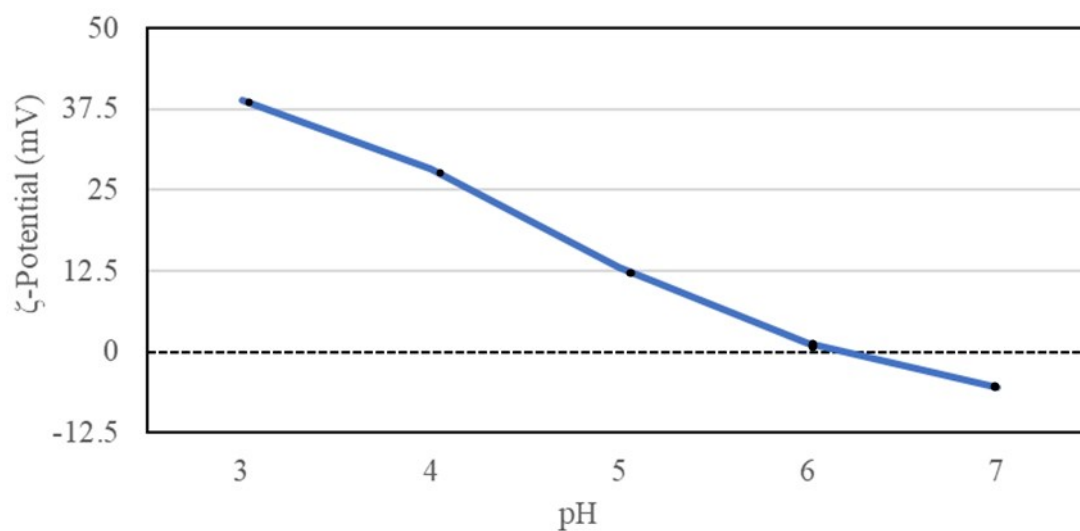

**Fig. S5**  $\zeta$ -potential measurements of the initial iron oxide NPs in a range of different pH values.

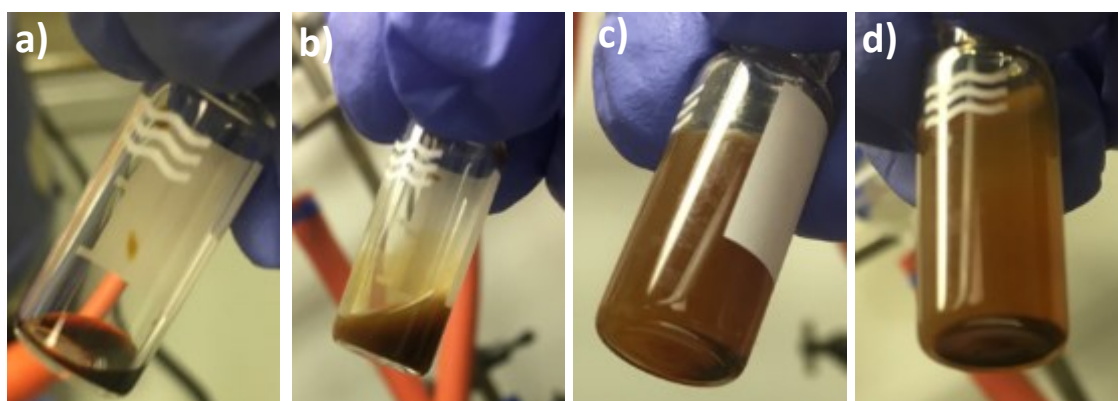

**Fig. S6** Photographs of the dispersion of pre-treatment iron oxide NPs: a) no nitric acid added, b) 0.5 ml of 0.1 M nitric acid added, c) 1 ml nitric of 0.1 M nitric acid and d) 1.5 ml of 0.1 M nitric acid added.

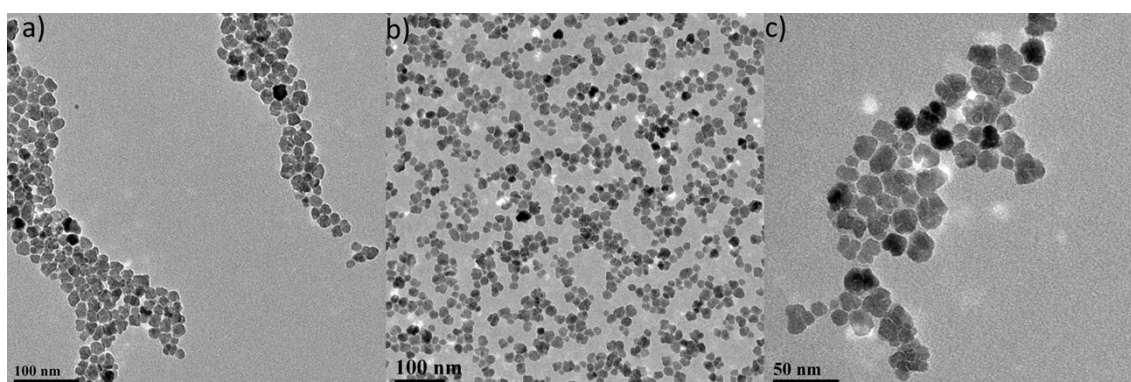

**Fig. S7** TEM images of APS-modified iron oxide nanoparticles

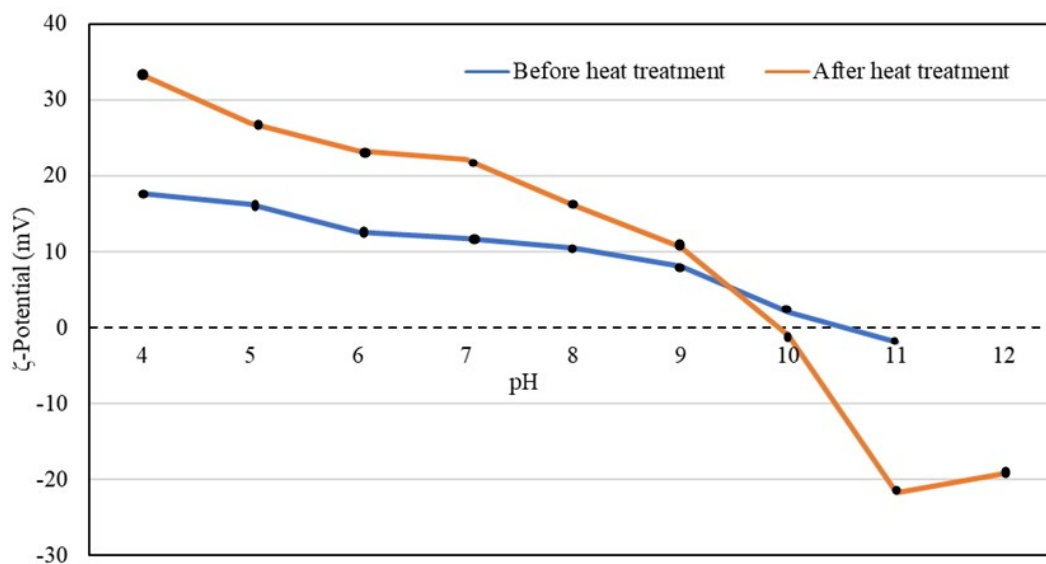

**Fig. S8**  $\zeta$ -potential measurement of APS-modified iron oxide NPs before and after heat treatment at 110 °C

**Table S1:** FTIR absorption frequencies of standard APS<sup>S1</sup>

| Wavenumber (cm <sup>-1</sup> ) | Intensity   | Assignments                     |
|--------------------------------|-------------|---------------------------------|
| 816                            | Strong      | Si-O-CH <sub>3</sub> stretching |
| 1083                           | Very Strong | Si-O-C stretching               |
| 1118                           | Strong      | O-CH <sub>3</sub> rocking       |
| 1455                           | Medium      | CH <sub>2</sub> shearing        |
| 1588                           | Weak        | NH shearing                     |
| 2842                           | Strong      | O-CH <sub>3</sub> stretching    |
| 2930                           | Strong      | CH <sub>2</sub> stretching      |

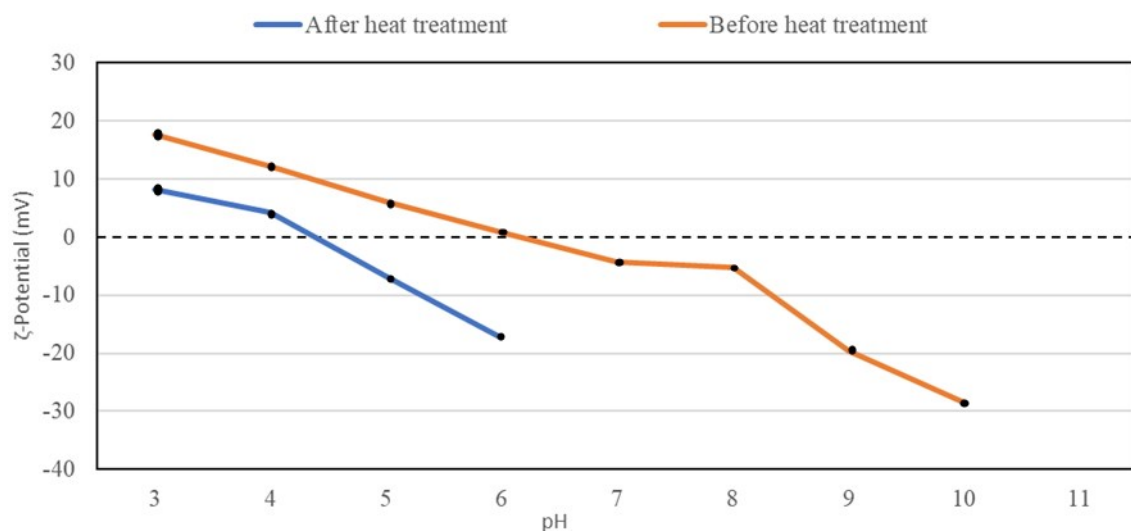

**Fig. S9**  $\zeta$ -potential measurements of the carboxylic acid-modified iron oxide nanoparticles before and after heat treatment.

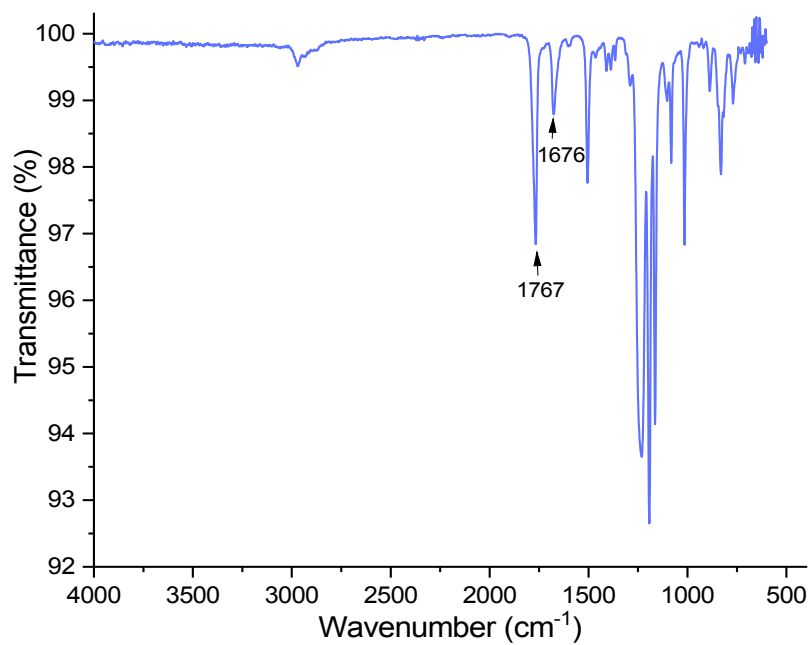

**Fig. S10** FTIR spectrum of carboxylic acid-modified iron oxide nanoparticles

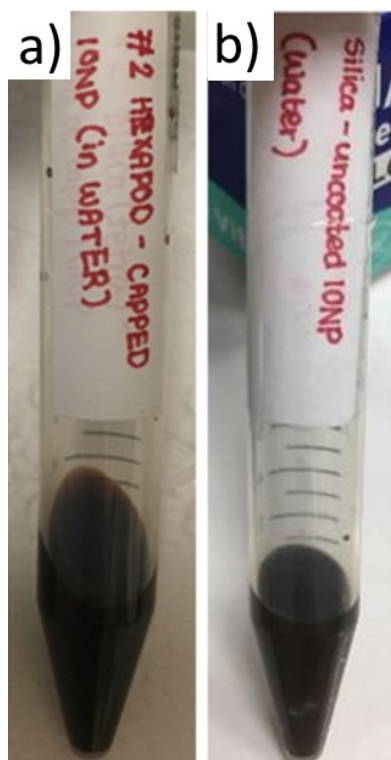

**Fig. S11** Visual images of the colloidal dispersion of nanocomposites consisting of silica dimples and citrate-capped iron oxide NFs a) and uncapped iron oxide NFs (b). The latter sample was used for As removal



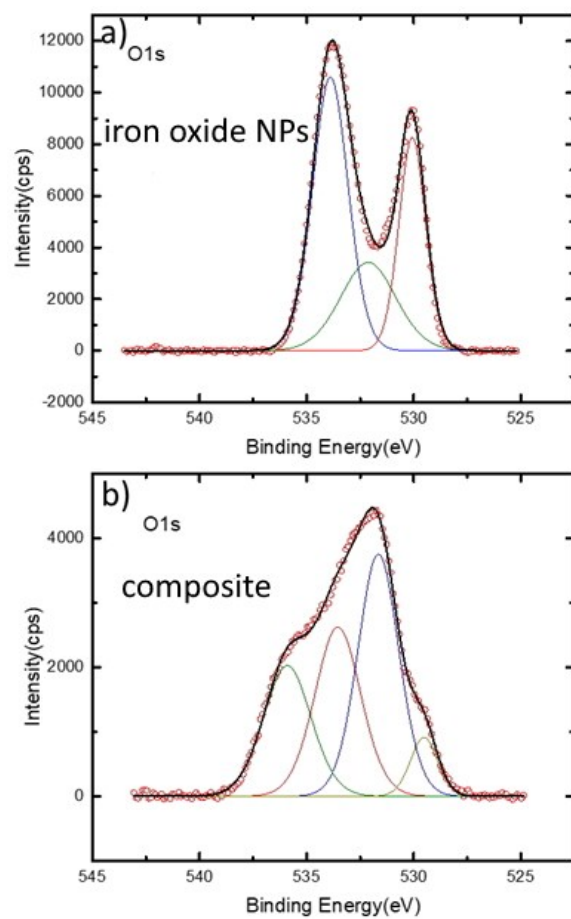

**Fig. S12** High-resolution XPS spectra at the O1s: a) iron oxide NPs, b) silica dimples@iron oxide NPs

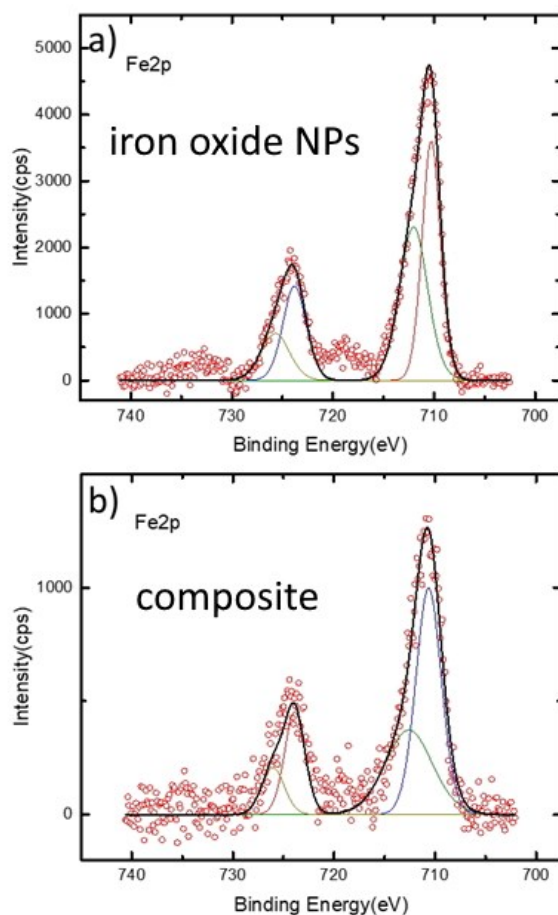

**Fig. S13** High-resolution XPS spectra at the Fe2p a) iron oxide NPs, b) SiO<sub>2</sub> dimples@iron oxide NPs

**Table S2:** As-to-Fe mass ratio determined by XPS for various As(V) concentrations and acidities for silica dimples@iron oxide NPs

| pH | As(V) concentration (mg/L) | As/Fe |
|----|----------------------------|-------|
| 6  | 1                          | 0.011 |
| 6  | 5                          | 0.028 |
| 6  | 10                         | 0.052 |
| 6  | 20                         | 0.097 |
| 8  | 10                         | 0.033 |
| 10 | 10                         | 0.024 |

(S1) S. Mornet, J. Portier and E. Duguet, *J. Magn. Magn. Mater.* 2005, **293**, 127

**References**
